# Supplementary material for: Toward a conceptual framework of hyporheic exchange across spatial scales
Source: Copernicus journal article supplement (doi:10.5194/hess-22-6163-2018), 2018-11-30
Supplement: Supplementary file 1 [file hess-22-6163-2018-supplement.pdf]

Supplement of Hydrol. Earth Syst. Sci., 22, 6163–6185, 2018  
<https://doi.org/10.5194/hess-22-6163-2018-supplement>  
© Author(s) 2018. This work is distributed under  
the Creative Commons Attribution 4.0 License.

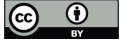

*Supplement of*

## **Toward a conceptual framework of hyporheic exchange across spatial scales**

**Chiara Magliozzi et al.**

*Correspondence to:* Robert C. Grabowski ([r.c.grabowski@cranfield.ac.uk](mailto:r.c.grabowski@cranfield.ac.uk))

The copyright of individual parts of the supplement might differ from the CC BY 4.0 License.

Table S1: Collection of worldwide field studies on the hyporheic exchange across a broad range of hydrogeological, topographical and geological settings. Table shows references, geographical zone and state, river name, and information on catchment scale: geology (sediment size and hydraulic conductivity), topographical/morphological, ecological (in-channel vegetation), anthropogenic (agricultural or human infrastructure).

| Source                     | Hydrological                                                                              | Hydrogeological                                                                                                | Topographical | Anthropogenic & Ecological                                                                                   |
|----------------------------|-------------------------------------------------------------------------------------------|----------------------------------------------------------------------------------------------------------------|---------------|--------------------------------------------------------------------------------------------------------------|
| Angermann et al., 2012     | Europe, UK; Atlantic biogeographic region; River Tern; Rainfall: 583 mm / yr              | Dominant geology is Permo-Triassic sandstone                                                                   | /             | /                                                                                                            |
| Anibas et al., 2012        | Europe; Poland; Continental biogeographic region. Rainfall: 550-700mm/yr, 3 subcatchments | Extensive depression formed during the last glaciations. Unconsolidated aquifers intermixed with confined ones | /             | mostly natural but in the low areas of the catchment meadows and pastures                                    |
| Anibas et al., 2009        | Europe; Belgium; Continental biogeographic region                                         | /                                                                                                              | /             | agricultural landuse and weirs structures                                                                    |
| Arntzen et al., 2006       | USA; Washington; Columbia Rive; Hanford Reachr; Continental biogeographic region          | Miocene to Pliocene of the Ringold Formation, Pleistocene flood gravels of the Hanford Formation               | /             | /                                                                                                            |
| Bourke et al., 2014        | Australia; Subtropical Biogeographic region; Marillana Creek                              | pisolitic goethite, chert and dolerite                                                                         | /             | mine                                                                                                         |
| Briggs et al., 2010        | USA; Massachussets; Ipswich River; humid continental biogeographic region                 | /                                                                                                              | /             | three main stem anthropogenic dams                                                                           |
| Czernuszenko et. al., 1998 | Europe; Moldavia; Botna, Byk and Kogilnik Rivers; Continantal biogeographic region        | /                                                                                                              | /             | /                                                                                                            |
| Datry et al 2008           | New Zealand; Selwyn River, Atlantic biogeographic region                                  | confined and semi-confined aquifers                                                                            | /             | /                                                                                                            |
| Dujardin et al 2014        | Europe; Belgium; Continental biogeographic region ;Zenne River Rainfall: 852 mm/year      | /                                                                                                              | /             | considerable chemical industrial activity                                                                    |
| Duke et al 2007            | USA; Texas; Cow Bayou Stream; Humid Subtropical biogeographic region. Rainfall: 82 cm/ yr | Eagle Ford shale                                                                                               | /             | Dam structure. Agriculture and rangeland Small riparian forest of <i>Ulmus crassifolia</i> , <i>Fraxinus</i> |

|                                                        |                                                                                                          |                                                                                                                                                                                  |                      |                                                                                                                                    |
|--------------------------------------------------------|----------------------------------------------------------------------------------------------------------|----------------------------------------------------------------------------------------------------------------------------------------------------------------------------------|----------------------|------------------------------------------------------------------------------------------------------------------------------------|
|                                                        |                                                                                                          |                                                                                                                                                                                  |                      | <i>texensis, Juniperus ashei</i>                                                                                                   |
| Edwardson et al., 2003                                 | USA; Alaska; Kuparuk River; Oceanic-Artic biogeographic region                                           | /                                                                                                                                                                                | /                    | /                                                                                                                                  |
| Fernald et al., 2001                                   | USA; Oregon; Willamette River; Humid-semiarid biogeographic region                                       | Holocene alluvium                                                                                                                                                                | /                    | /                                                                                                                                  |
| Gooseff et al., 2003                                   | Antartica; Delta Stream and Green Creek; Polar biogeographic region                                      | /                                                                                                                                                                                | /                    | /                                                                                                                                  |
| Haggard <i>et al.</i> , 2001                           | USA; Oklahoma; Dry Creek, Cloud Creek, and Cherokee Creek (Lake Eucha–Spavinaw Basin); humid-subtropical | karstic                                                                                                                                                                          | /                    | /                                                                                                                                  |
| Hall et al., 2002                                      | USA; New Hampshire; 13 Streams; Continantal Biogeographic region                                         | bedrock superficial                                                                                                                                                              |                      | forested: <i>Fagus grandifolia</i> , <i>Acer saccharum</i> <i>Betula alleghaniensis</i>                                            |
| Hart et el., 1999                                      | USA; Tennessee; West Fork of Walker Branch; Continental biogeographic region                             | bedrock outcrops                                                                                                                                                                 | /                    | /                                                                                                                                  |
| Harvey and Fuller, 1998<br>Harvey <i>et al.</i> , 2003 | USA; Arizona; Pinal Creek; semi-desert biogeographic region                                              | regional aquifer composed of partially cemented basin fill, a more shallow one is present (sand and gravel). The aquifer presents igneous rock formations and can be constricted | /                    | /                                                                                                                                  |
| Jones <i>et al.</i> , 2008                             | USA; Oregon; Umatilla River; humid-semidesertic biogeographic region                                     | Columbia Plateau basalt                                                                                                                                                          | naturally anabrached | /                                                                                                                                  |
| Kasahara <i>et al.</i> , 2003                          | USA; Oregon; Lookout Creek; Humid-semiarid, biogeographic region. Rainfall: 2300 -3550 mm/yr             | /                                                                                                                                                                                | /                    | forested <i>Psudotsuga menziesii</i> , <i>Tsuga heterophylla</i> , <i>Thuja plicata</i> , <i>Alnus rubra</i> and <i>Salix</i> spp. |

|                                                  |                                                                                                                   |                                                                  |   |                                                                             |
|--------------------------------------------------|-------------------------------------------------------------------------------------------------------------------|------------------------------------------------------------------|---|-----------------------------------------------------------------------------|
| Kasahara <i>et al.</i> , 2006                    | Canada; Ontario; Rouge River tributary 1; Rouge River tributary 2; Silver Creek; Continental biogeographic region | unconfined aquifer                                               | / | /                                                                           |
| Kasahara <i>et al.</i> , 2007                    | Canada; Ontario; Boyne River and others; Continental biogeographic region                                         | /                                                                | / | /                                                                           |
| Kaser <i>et al.</i> , 2013                       | Europe; UK; River Leith; Atlantic biogeographic. Rainfall 900 mm/yr                                               | aeolian Penrith Sandstone                                        | / | /                                                                           |
| Knust <i>et al.</i> , 2009                       | USA; Nevada; Truckee River; Desert biogeographic. Rainfall: 18cm/year                                             | /                                                                | / | coniferous forests                                                          |
| Krause <i>et al.</i> , 2013                      | Europe; UK; River Tern; Atlantic biogeographic                                                                    | Permo-Triassic sandstone                                         | / | /                                                                           |
| Laenen and Bencala, 2001                         | USA; Oregon; Willamette River; Humid-semiarid biogeographic                                                       | late Pleistocene                                                 | / | /                                                                           |
| Lamontagne and Cook, 2007                        | Australia; Swamp Oak creek; Subtropical biogeographic region<br>Rainfall: 670 mm/ yr                              | /                                                                | / | /                                                                           |
| Lansdown <i>et al.</i> , 2012                    | Europe; UK; River Leith; Atlantic biogeographic                                                                   | Permo–Triassic sandstone                                         | / |                                                                             |
| Lautz and Siegel, 2006<br>Lautz and Siegel, 2007 | USA; Wyoming; Red Canyon Creek; Semi-arid Intermountain province.<br>Rainfall: 35 cm/yr                           | Phosphoria Formation.<br>Chugwater Formation.<br>Gravel terraces | / | livestock grazing                                                           |
| Malcolm <i>et al.</i> , 2005                     | Europe; UK; Glen Gironck; Atlantic biogeographic region<br>Rainfall: 1100 mm/yr                                   | schists and gneisses                                             | / | semi-natural heather ( <i>Calluna</i> ) moorland                            |
| Malcolm <i>et al.</i> , 2010                     | Europe; UK ; Newmills Burn Gironck Burn; Atlantic biogeographic region                                            | psammite and pelite, granite and schist                          | / | arable farming and livestock                                                |
| Malzone <i>et al.</i> , 2015                     | USA; New York State; Elton Creek<br>Continental biogeographic region<br>Rainfall: 760 and 1145mm                  | Glaciated Appalachian Plateau                                    | / | Land use is primarily forest, dairy, and agriculture with few urban regions |
| Morrice <i>et al.</i> , 1997                     | USA; New Mexico; Aspen Creek<br>Calaveras Gallina Creek; Semiarid biogeographic region                            | Permian sandstone and siltstone<br>Bandelier turf granite/gneiss | / | /                                                                           |

|                                |                                                                                             |                                                                                                   |   |                                                                                                                              |
|--------------------------------|---------------------------------------------------------------------------------------------|---------------------------------------------------------------------------------------------------|---|------------------------------------------------------------------------------------------------------------------------------|
| Mouw <i>et al.</i> , 2009      | Alaska; Middle Flathead River<br>Talkeetna River; Arctic biogeographic region               | /                                                                                                 | / | /                                                                                                                            |
| Munz <i>et al.</i> , 2011      | Europe; UK; River Leith; Atlantic biogeographic region<br>Rainfall: 900 mm/yr               | Permotriassic Sandstone                                                                           | / | /                                                                                                                            |
| Mutz <i>et al.</i> , 2000      | Europe; Germany; Schlaube Stream; Continental biogeographic region                          | /                                                                                                 | / | /                                                                                                                            |
| Mutz <i>et al.</i> , 2003      | Europe; Germany; Schlaube Stream; Continental biogeographic region                          | /                                                                                                 | / | /                                                                                                                            |
| O'Connor <i>et al.</i> , 2008  | USA; California; Elder Creek; Mediterranean biogeographic region                            | /                                                                                                 | / | /                                                                                                                            |
| Ock <i>et al.</i> , 2015       | USA; California; The Trinity River; Mediterranean biogeographic region                      | /                                                                                                 | / | Impounded by the Trinity Dam and the Lewiston Dam since 1964. Flow diverted into the Sacramento River for field irrigation   |
| Pinay <i>et al.</i> , 2009     | Alaska; Lynx Creek; Arctic biogeographic region                                             | /                                                                                                 | / | boreal forest association of white spruce, <i>Picea glauca</i> , interspersed with balsam poplar, <i>Populus balsamifera</i> |
| Ruehl <i>et al.</i> , 2006     | USA; California; Pajaro River; Mediterranean biogeographic region.<br>Rainfall: 33-55 cm/yr | Holocene deposits, the Aromas Formation (Pleistocene), Purisima Formation (Pliocene)              | / | agriculture land use                                                                                                         |
| Sawyer <i>et al.</i> , 2012    | USA; New Mexico; San Antonio Creek; Semiarid biogeographic region<br>Rainfall: 476 mm/yr    | /                                                                                                 | / | /                                                                                                                            |
| Stofleth <i>et al.</i> , 2008  | USA; Mississippi; Topashaw Creek; Continental biogeographic region                          | /                                                                                                 | / | /                                                                                                                            |
| Stonedahl <i>et al.</i> , 2012 | USA; Indiana; Sugar Creek; Continental biogeographic region                                 | /                                                                                                 | / | /                                                                                                                            |
| Storey <i>et al.</i> , 2003    | Canada; Ontario; Speed River<br>Continental biogeographic region                            | primary aquifer is in the dolomite bedrock. The bedrock is overlain by layers of low-permeability | / | /                                                                                                                            |

|                                |                                                                                              |                                                                                                      |   |                                                                                                                                                       |
|--------------------------------|----------------------------------------------------------------------------------------------|------------------------------------------------------------------------------------------------------|---|-------------------------------------------------------------------------------------------------------------------------------------------------------|
|                                |                                                                                              | glacial till, kame, and outwash deposits                                                             |   |                                                                                                                                                       |
| Swanson <i>et al.</i> , 2010   | USA; New Mexico; Jaramillo Creek; Semiarid biogeographic region                              | /                                                                                                    | / | /                                                                                                                                                     |
| Thomas <i>et al.</i> , 2003    | USA; North Carolina; Snake Den Branch; Continental biogeographic region; Rainfall: 200 cm/yr | crystalline rock, schists, gneiss                                                                    | / | /                                                                                                                                                     |
| Triska <i>et al.</i> , 1993    | USA; California; Little Lost Man Creek; Continental biogeographic region                     | /                                                                                                    | / | /                                                                                                                                                     |
| Wagenhoff <i>et al.</i> , 2014 | New Zealand; Kiripaka Stream Whakakai Stream; Atlantic biogeographic region                  | sedimentary sandstones and siltstones                                                                | / | Kiripaka Stream native forest in the headwaters and intensive pasture grazed by sheep and cattle. Whakakai Stream evergreen podocarp- hardwood forest |
| Wagner <i>et al.</i> , 2003    | Europe; Austria; Oberer Seebach; Continental biogeographic region                            | /                                                                                                    | / | /                                                                                                                                                     |
| Wondzell <i>et al.</i> , 2009  | USA; Alaska; Bambi Creek; Artic biogeographic region. Rainfall: 1600 mm/a                    | /                                                                                                    | / | /                                                                                                                                                     |
| Wondzell <i>et al.</i> , 2006  | USA; Oregon Andrews Experimental Forest; Humid-semiarid biogeographic region                 | bedrock outcrops                                                                                     | / | /                                                                                                                                                     |
| Wroblicky <i>et al.</i> , 1998 | USA; New Mexico; Aspen Creek, Rio Calavera; semiarid biogeographic region                    | Lower Permian fine sandstones and siltstones of the Meseta Blanca Member of the Lower Yeso Formation | / | /                                                                                                                                                     |
| Zarnetske <i>et al.</i> , 2011 | USA; Oregon; Drift Creek; humid-semiarid biogeographic region. Rainfall: 1190 mm/yr          | /                                                                                                    | / | agriculture (lower catchment) forestry (upper catchment)                                                                                              |

Table S2: Collection of worldwide field studies on the hyporheic exchange across a broad range of hydrogeological, topographical and geological settings. Table shows references, geographical zone and state, river name, and information on valley scale: geology (sediment size and hydraulic conductivity), topographical/morphological, ecological (in-channel vegetation), anthropogenic (agricultural or human infrastructure).

| Source                     | Hydrological                                                                                                                                       | Hydrogeological                                                                                                                                                                                                   | Topographical                            | Ecological                                                                                          | Anthropogenic                                                          |
|----------------------------|----------------------------------------------------------------------------------------------------------------------------------------------------|-------------------------------------------------------------------------------------------------------------------------------------------------------------------------------------------------------------------|------------------------------------------|-----------------------------------------------------------------------------------------------------|------------------------------------------------------------------------|
| Angermann et al., 2012     | Mean discharge is 0.9 m <sup>3</sup> s <sup>-1</sup> with Q95 of 0.4 m <sup>3</sup> s <sup>-1</sup> and Q10 of 1.39 m <sup>3</sup> s <sup>-1</sup> | /                                                                                                                                                                                                                 | lowland                                  | /                                                                                                   | agricultural                                                           |
| Anibas et al., 2012        | regular flood event after snowmelt in the upper catchment peatland is mostly groundwater fed                                                       | The morainic plateau is composed of heterogeneous loamy sand deposits. The flat alluvial valleys are filled with thick deposits of fluvioglacial sand and gravel which are covered by a variety of organic soils. | Lowland marshes and peat lenses (2-5 cm) | oak-beech forests, reed vegetation in the center of the valley and sedges closer to the slope crack | arable lands meadow and pastures in the lower section of the catchment |
| Anibas et al., 2009        | /                                                                                                                                                  | /                                                                                                                                                                                                                 | lowland                                  | /                                                                                                   | Agricultural landuse                                                   |
| Arntzen et al., 2006       | gaining condition                                                                                                                                  | unconfined aquifer                                                                                                                                                                                                | various topography                       | /                                                                                                   | /                                                                      |
| Bourke et al., 2014        | losing                                                                                                                                             | /                                                                                                                                                                                                                 | lowland                                  | /                                                                                                   | /                                                                      |
| Briggs et al., 2010        | /                                                                                                                                                  | /                                                                                                                                                                                                                 | med/low gradient                         | /                                                                                                   | wetland, agricultural land, woodland and urban areas                   |
| Czernuszenko et. al., 1998 | /                                                                                                                                                  | /                                                                                                                                                                                                                 | lowland                                  | /                                                                                                   | /                                                                      |
| Datry et al 2008           | larger gaining and losing sections of the valley                                                                                                   | /                                                                                                                                                                                                                 |                                          | shrubs                                                                                              | /                                                                      |
| Dujardin et al             | /                                                                                                                                                  | /                                                                                                                                                                                                                 | lowland                                  | /                                                                                                   | /                                                                      |

|                                                        |   |                     |                                                      |                                                                                                                |                                                                                                                                                        |
|--------------------------------------------------------|---|---------------------|------------------------------------------------------|----------------------------------------------------------------------------------------------------------------|--------------------------------------------------------------------------------------------------------------------------------------------------------|
| 2014                                                   |   |                     |                                                      |                                                                                                                |                                                                                                                                                        |
| Duke et al 2007                                        | / | /                   | /                                                    | Riparian forest:<br><i>Ulmus crassifolia</i> ,<br><i>Fraxinus texensis</i> , <i>Juniperus ashei</i>            | agriculture, small                                                                                                                                     |
| Edwardson et al., 2003                                 | / | /                   | braided, sinuous                                     | <i>Carex aquatilis</i> and<br><i>Eriophorum vaginatum</i> , <i>Betula nana</i>                                 |                                                                                                                                                        |
| Haggard <i>et al.</i> , 2001                           | / | shallow silt loams. | /                                                    | sycamore trees in Dry Creek and a mix of sycamore trees and other hardwoods in Cloud Creek and Cherokee Creek. | Dry Creek and Cherokee Creek had large grass pastures whereas the up-slope vegetation at Cloud Creek was characterized by underbrush and forest layers |
| Hall et al., 2002                                      | / | /                   | medium/low gradient                                  | American beech<br>sugar maple yellow birch                                                                     |                                                                                                                                                        |
| Hart et el., 1999                                      | / | /                   | /                                                    | deciduous forest                                                                                               |                                                                                                                                                        |
| Harvey and Fuller, 1998<br>Harvey <i>et al.</i> , 2003 | / | /                   | medium/low gradient                                  | tamarisk seedlings,<br>willows                                                                                 |                                                                                                                                                        |
| Jones <i>et al.</i> , 2008                             | / | /                   | bedrock valley with spring                           | /                                                                                                              | /                                                                                                                                                      |
| Kasahara <i>et al.</i> , 2003                          | / | /                   | Upland bedrock contrained and unconstrained sections |                                                                                                                | /                                                                                                                                                      |
| Kasahara <i>et al.</i> , 2006                          | / | /                   | lowland                                              | grass-vegetated floodplain                                                                                     | residential and agriculture fields                                                                                                                     |



|                                                  |                                                                                                                                                                                |   |                                            |                            |                                                                                 |
|--------------------------------------------------|--------------------------------------------------------------------------------------------------------------------------------------------------------------------------------|---|--------------------------------------------|----------------------------|---------------------------------------------------------------------------------|
| Kasahara <i>et al.</i> , 2007                    | /                                                                                                                                                                              | / | /                                          | willows along the banks    | agricultural (crop and soya beans)                                              |
| Kaser <i>et al.</i> , 2013                       | gaining                                                                                                                                                                        | / | meanders within a narrow floodplain (<100) | /                          | /                                                                               |
| Knust <i>et al.</i> , 2009                       | /                                                                                                                                                                              | / | lowland                                    | coniferous forest          | /                                                                               |
| Krause <i>et al.</i> , 2013                      | /                                                                                                                                                                              | / | lowland                                    | /                          | extensive agricultural land use                                                 |
| Laenen and Bencala, 2001                         | /                                                                                                                                                                              | / | Lowland alluvial fans                      | /                          | /                                                                               |
| Lamontagne and Cook, 2007                        | /                                                                                                                                                                              | / |                                            | /                          | /                                                                               |
| Lansdown <i>et al.</i> , 2012                    | /                                                                                                                                                                              | / | lowland                                    | /                          | agricultural fields                                                             |
| Lautz and Siegel, 2006<br>Lautz and Siegel, 2007 | /                                                                                                                                                                              | / | upland                                     | /                          | /                                                                               |
| Malcolm <i>et al.</i> , 2005                     | mean discharge of 0.5 m <sup>3</sup> s <sup>-1</sup> , varying between <0.01 m <sup>3</sup> s <sup>-1</sup> in the summer and >23 m <sup>3</sup> s <sup>-1</sup> during floods | / | upland                                     | heather (Calluna) moorland | /                                                                               |
| Malcolm <i>et al.</i> , 2010                     | /                                                                                                                                                                              | / | lowland                                    | /                          | heather moorland, and commercial and semi-natural forest in the lower catchment |
| Malzone <i>et al.</i> , 2015                     | gaining                                                                                                                                                                        | / | gaining stream                             | /                          | /                                                                               |
| Morrice <i>et al.</i> , 1997                     | /                                                                                                                                                                              | / | upland                                     | /                          | /                                                                               |

|                               |   |   |                                                                                                |                                                                                                                                                                                                                                                                                          |                               |
|-------------------------------|---|---|------------------------------------------------------------------------------------------------|------------------------------------------------------------------------------------------------------------------------------------------------------------------------------------------------------------------------------------------------------------------------------------------|-------------------------------|
| Mouw <i>et al.</i> , 2009     | / | / | lowland. Large alluvial flood plains                                                           | <i>Populus balsamifera</i> and shrub communities by <i>Salix</i> sp and <i>Alnus incana</i> on surfaces flooded. Forested benches are dominated by <i>P. balsamifera</i> , <i>Picea engelmannii</i> , <i>Pseudotsuga menziesii</i> , <i>Larix occidentalis</i> , <i>Abies lasiocarpa</i> | cottonwood and spruce forests |
| Munz <i>et al.</i> , 2011     | / | / | lowland. narrow floodplain 100m wide. steep slopes with occasional outcrops of the PTS bedrock | grassland vegetation                                                                                                                                                                                                                                                                     | livestock grazing             |
| Mutz <i>et al.</i> , 2000     | / | / | lowland. many springs and small streamlets draining from the valley slopes into the stream     | /                                                                                                                                                                                                                                                                                        | /                             |
| Mutz <i>et al.</i> , 2003     | / | / | lowland                                                                                        | woodland                                                                                                                                                                                                                                                                                 | /                             |
| O'Connor <i>et al.</i> , 2008 | / | / | lowland                                                                                        | /                                                                                                                                                                                                                                                                                        | /                             |
| Pinay <i>et al.</i> , 2009    | / | / | /                                                                                              | willow <i>Salix</i> sp., moist tundra communities at low elevations; and extensive stands of green alder, <i>Alnus crispa</i> , at higher elevations. Little alder is found in riparian areas                                                                                            | /                             |

|                                          |                                                                           |   |                                                                                            |                                                                                                                     |                                                                                                                                                         |
|------------------------------------------|---------------------------------------------------------------------------|---|--------------------------------------------------------------------------------------------|---------------------------------------------------------------------------------------------------------------------|---------------------------------------------------------------------------------------------------------------------------------------------------------|
| Ruehl <i>et al.</i> ,<br>2006            | mean daily discharge<br>0 and 610 m <sup>3</sup> /s from 1939<br>to 2003. | / | lowland                                                                                    | /                                                                                                                   | /                                                                                                                                                       |
| Sawyer <i>et al.</i> ,<br>2012           | /                                                                         | / | lowland, unconfined<br>valley                                                              | /                                                                                                                   | /                                                                                                                                                       |
| Stofleth <i>et al.</i> ,<br>2008         | /                                                                         | / | lowland, straightened<br>(upstream) and<br>channelized<br>(downstream) the<br>chosen reach | /                                                                                                                   | Little Topashaw Creek:<br>cultivated valley floors<br>and forested hillslopes<br>Goodwin Creek<br>predominately is forest,<br>pasture, and fallow lands |
| Stonedahl <i>et al.</i><br>, 2012        | /                                                                         | / | Lowland ditched and<br>straightened                                                        | /                                                                                                                   | agricultural fields                                                                                                                                     |
| Storey <i>et al.</i> ,<br>2003           | /                                                                         | / | lowland                                                                                    | /                                                                                                                   | /                                                                                                                                                       |
| Swanson <i>et al.</i><br>, 2010          | /                                                                         | / | sinuous, with steep<br>stream banks                                                        | /                                                                                                                   | /                                                                                                                                                       |
| Thomas <i>et al.</i> ,<br>2003           | /                                                                         | / | steep                                                                                      | mountain laurel<br>( <i>Kalmia latifolia</i> L.)<br>and rhododendron<br>( <i>Rhododendron</i><br><i>maximum</i> L.) | /                                                                                                                                                       |
| Wagenhoff <i>et</i><br><i>al.</i> , 2014 | /                                                                         | / | upland                                                                                     | /                                                                                                                   | /                                                                                                                                                       |
| Wagner <i>et al.</i> ,<br>2003           | /                                                                         | / | alpine                                                                                     | /                                                                                                                   | /                                                                                                                                                       |
| Wondzell <i>et al.</i><br>, 2009         | /                                                                         | / | lowland                                                                                    | /                                                                                                                   | natural                                                                                                                                                 |
| Wondzell <i>et al.</i><br>, 2006         | /                                                                         | / | unconstrained                                                                              | /                                                                                                                   | /                                                                                                                                                       |
| Wroblicky <i>et al.</i><br>, 1998        | /                                                                         | / | variable                                                                                   | /                                                                                                                   | /                                                                                                                                                       |

Table S3: Collection of worldwide field studies on the hyporheic exchange across a broad range of hydrogeological, topographical and geological settings. Table shows references, geographical zone and state, river name, and information on reach: geology (sediment size and hydraulic conductivity), topographical/morphological, ecological (in-channel vegetation), anthropogenic (agricultural or human infrastructure).

| Source                 | Hydrological                                                                                                                                                                                                                                                                                                                                                                                                                                                                                                                                | Hydrogeological                                                                                                                   | Topographical                                             | Ecological                                 |
|------------------------|---------------------------------------------------------------------------------------------------------------------------------------------------------------------------------------------------------------------------------------------------------------------------------------------------------------------------------------------------------------------------------------------------------------------------------------------------------------------------------------------------------------------------------------------|-----------------------------------------------------------------------------------------------------------------------------------|-----------------------------------------------------------|--------------------------------------------|
| Angermann et al., 2012 | midsize gravel,different sizes of sand,fine silty materials.                                                                                                                                                                                                                                                                                                                                                                                                                                                                                | hydraulic conductivities: $10^{-3}$ to $10^{-5} \text{ ms}^{-1}$ and $10^{-8}$ to $10^{-9} \text{ ms}^{-1}$ (Krause et al., 2012) | Meander, pool-riffle- pool bedforms                       | /                                          |
| Anibas et al., 2012    | loamy sand deposits; thick deposits of fluvio-glacial sands and gravels which are covered by a variety of organic soil.                                                                                                                                                                                                                                                                                                                                                                                                                     | see Table 2 for hydraulic conductivities                                                                                          | meander and straight section steep banks                  | banks mostly are covered with reed plants. |
| Anibas et al., 2009    | fine sand and some organic material                                                                                                                                                                                                                                                                                                                                                                                                                                                                                                         | thermal conductivity: $1.8 \text{ Js}^{-1} \text{ m}^{-1} \text{ K}^{-1}$                                                         | straight and canalized                                    | /                                          |
| Arntzen et al., 2006   | cobble (>64 to <=128mm) in a matrix of fine sand (>0.062 to <=0.5mm). At rkm 602 site, the median grain size—D50 was 57.7mm. At rkm 582 site, the dominant substrate was coarse gravel (>16 to <=64mm) in a matrix consisting mostly of fine sand (>0.062 to <=0.5 mm). The D50 at rkm 582 was 35.5mm. At rkm 577, the dominant substrate was coarse gravel (>16 to <=64mm) in a matrix consisting of fine sand. However, there was a silt component at rkm 577 much larger than at the other two locations. The D50 at rkm 577 was 22.3mm. | hydraulic conductivities: $8.8 \times 10^{-3} \text{ cms}^{-1}$ to $2.9 \times 10^{-4} \text{ cms}^{-1}$                          | /                                                         | /                                          |
| Bourke et al., 2014    | /                                                                                                                                                                                                                                                                                                                                                                                                                                                                                                                                           | hydraulic conductivity 1500 and $3700 \text{ md}^{-1}$                                                                            | straight, section with pools, riffles and glides bedforms | /                                          |
| Briggs et al., 2010    | hallow soils and glacial deposits                                                                                                                                                                                                                                                                                                                                                                                                                                                                                                           | /                                                                                                                                 | meander section                                           | beaver activity and wood dams              |

|                                              |                                                                           |                                                         |                                                                                      |                                                      |
|----------------------------------------------|---------------------------------------------------------------------------|---------------------------------------------------------|--------------------------------------------------------------------------------------|------------------------------------------------------|
| Czernuszenko et al., 1998                    | /                                                                         | /                                                       | Straight Low sinuosity                                                               | /                                                    |
| Datry et al 2008                             | gravels, cobbles, and small boulders                                      | /                                                       | riffles, profluvial bars, terraces                                                   | annual grasses and herbs                             |
| Dujardin et al 2014                          | silty and clay- loam                                                      | hydraulic conductivities see Table 2                    | /                                                                                    | /                                                    |
| Duke et al 2007                              | clay-rich vertisol                                                        | 0.104 cm h <sup>-1</sup>                                | /                                                                                    | <i>J. ashei</i>                                      |
| Edwardson et al., 2003                       | cobble, gravel, peat but variable according to site                       | hydraulic conductivities: see Table 3                   | pool riffles, meanders, Debris dam                                                   | /                                                    |
| Fernald et al., 2001                         | gravel Holocene deposit                                                   | 10 <sup>-2</sup> and 10 <sup>-1</sup> m s <sup>-1</sup> | two large island complexes with anastomosing channels and extensive exposed gravels. | /                                                    |
| Gooseff et al., 2003                         | very porous                                                               | /                                                       | /                                                                                    | /                                                    |
| Haggard et al., 2001                         | cobbles with some fines                                                   | /                                                       | /                                                                                    | /                                                    |
| Hall et al., 2002                            | cobbles and boulders                                                      | /                                                       | debris dams                                                                          | /                                                    |
| Hart et al., 1999                            | gravel and cobbles, bedrock outcrops                                      | /                                                       | boulders and debris dams are                                                         | input of deciduous forest: leaves                    |
| Harvey and Fuller, 1998, Harvey et al., 2003 | sand and gravel                                                           | /                                                       | straight section cobbles and channel parallel bars at side and central channel       | /                                                    |
| Jones et al., 2008                           | basalt gravel, cobbles, and boulders intermixed with silt and sand lenses | 300 to 700 m day <sup>-1</sup>                          | naturally anabranching                                                               | in-channel macrophytes vegetation (season dependent) |
| Kasahara et al., 2003                        | coarse-textured gravel                                                    | /                                                       | /                                                                                    | /                                                    |

|                                                |                                                                                                    |                                                                                |                                                                  |                                                  |
|------------------------------------------------|----------------------------------------------------------------------------------------------------|--------------------------------------------------------------------------------|------------------------------------------------------------------|--------------------------------------------------|
| Kasahara <i>et al.</i> , 2006                  | cobbles                                                                                            | <0.1m day <sup>-1</sup> to >10 m day <sup>-1</sup>                             | riffles and step from restoration project                        | /                                                |
| Kasahara <i>et al.</i> , 2007                  | gravel bed channel,silt and clay                                                                   | 0.3 to >20m day <sup>-1</sup>                                                  | gravel bar and menader bends were selected for studying          |                                                  |
| Kaser <i>et al.</i> , 2013                     | soft sediment                                                                                      | 2.7–2.8x10 <sup>-5</sup> ms <sup>-1</sup>                                      | Meander riffle-pool sequences                                    | /                                                |
| Knust <i>et al.</i> , 2009                     | cobbles and boulders                                                                               | /                                                                              | straighter and wider                                             | /                                                |
| Krause <i>et al.</i> , 2013                    | Midsize gravel, Different sizes of sand Fine silty materials                                       | hydraulic conductivities 10 <sup>-3</sup> to 10 <sup>-5</sup> ms <sup>-1</sup> | meandering section steep river banks, pool-riffle-pool sequences | /                                                |
| Laenen and Bencala, 2001                       | sands, silts, and clays                                                                            | /                                                                              | meandering and braided channel with many islands and sloughs.    | /                                                |
| Lamontagne and Cook, 2007                      | coarse sand, gravel, and cobble                                                                    | porosity of ~0.4                                                               | /                                                                | /                                                |
| Lansdown <i>et al.</i> , 2012                  | sand, gravel, and cobbles on sands and silts                                                       | /                                                                              | rifle and pool sequences                                         | /                                                |
| Lautz and Siegel, 2006, Lautz and Siegel, 2007 | gravel and fine sand but also silt                                                                 | hydraulic conductivity see Table 1 Lautz and Siegel 2006                       | meandering and straight sections                                 | debris dams and small log dams (natural and non) |
| Malcolm <i>et al.</i> , 2005                   | Podzols, gleys and peats                                                                           | /                                                                              | /                                                                | /                                                |
| Malcolm <i>et al.</i> , 2010                   | overlain by glacial till and meltwater deposits and overlain by glacial and fluviglacial deposits. | /                                                                              | deepened and straightened pool riffles,bars                      | /                                                |
| Malzone <i>et al.</i> , 2015                   | sand, gravel, clay, and till                                                                       | /                                                                              | pool and riffles sequences                                       | /                                                |

|                                |                                                                                                      |                                                             |                                                                         |                                                                                                      |
|--------------------------------|------------------------------------------------------------------------------------------------------|-------------------------------------------------------------|-------------------------------------------------------------------------|------------------------------------------------------------------------------------------------------|
| Morrice <i>et al.</i> , 1997   | 2%gravel 46%sand 42%silt 10%clay 36%gravel<br>53%sand 9%silt 2%clay boulders cobbles gravel and sand | /                                                           | /                                                                       | /                                                                                                    |
| Mouw <i>et al.</i> , 2009      | gravel to sand                                                                                       | /                                                           | anastomosing channels pools                                             | /                                                                                                    |
| Munz <i>et al.</i> , 2011      | silt to coarse sand                                                                                  | /                                                           | meandering section of the river. Longitudinal pool-riffle-pool sequence | riparian reed and grass vegetation. wet grassland and sparse riparian soft-wood vegetation alongside |
| Mutz <i>et al.</i> , 2000      | Fine/ medium sand with some gravel                                                                   | /                                                           | sinuous                                                                 | <i>Alnus glutinosa</i> and <i>Carpinus petulus</i> . In-channel wood.                                |
| Mutz <i>et al.</i> , 2003      | coarse to fine sands                                                                                 | /                                                           | /                                                                       | /                                                                                                    |
| O'Connor <i>et al.</i> , 2008  | boulders                                                                                             | /                                                           | riffle-pool. slope of 0.026. sinuosity ratio of 1.1                     | /                                                                                                    |
| Ock <i>et al.</i> , 2015       | coarse gravel                                                                                        | /                                                           | 4 channel-gravel features (bars and vegetated islands)                  | /                                                                                                    |
| Pinay <i>et al.</i> , 2009     | gravel                                                                                               | $2 \times 10^{-4}$ and $3 \times 10^{-3}$ $\text{cms}^{-1}$ | /                                                                       | /                                                                                                    |
| Ruehl <i>et al.</i> , 2006     | /                                                                                                    |                                                             | /                                                                       | /                                                                                                    |
| Sawyer <i>et al.</i> , 2012    | Mix cobbles, gravel on silt                                                                          | $4.0 \text{ m d}^{-1}$                                      | two straight runs separated by a meander. Pool and riffle sequences     | grasses and forbs.                                                                                   |
| Stofleth <i>et al.</i> , 2008  | silt and clay soils over sand                                                                        | /                                                           | tortuous reach section mild channel slope                               | /                                                                                                    |
| Stonedahl <i>et al.</i> , 2012 | gravel, pebble, and coarse sandy glacial                                                             | /                                                           | pools and riffles                                                       | /                                                                                                    |

|                                   |                                                                               |                                             |                                                                                                                                               |                                                                                                                                                                                                                                                                                                                                                                                                          |
|-----------------------------------|-------------------------------------------------------------------------------|---------------------------------------------|-----------------------------------------------------------------------------------------------------------------------------------------------|----------------------------------------------------------------------------------------------------------------------------------------------------------------------------------------------------------------------------------------------------------------------------------------------------------------------------------------------------------------------------------------------------------|
| Storey <i>et al.</i> ,<br>2003    | recent alluvium                                                               | $2 \times 10^{-4} \text{ ms}^{-1}$          | /                                                                                                                                             | /                                                                                                                                                                                                                                                                                                                                                                                                        |
| Swanson <i>et al.</i> ,<br>2010   | sand and gravel                                                               | $3.2 \times 10^{-5}$                        | losing condition of<br>the reach and pool-<br>riffle- pool<br>sequence                                                                        | banks stabilized by dense<br>communities of grasses                                                                                                                                                                                                                                                                                                                                                      |
| Thomas <i>et al.</i> ,<br>2003    | colluvial sediments coarse material                                           | /                                           | steep colluvial<br>sections                                                                                                                   | large oak-hickory stands<br>with cove hardwoods<br>common along the stream<br>channel                                                                                                                                                                                                                                                                                                                    |
| Triska <i>et al.</i> ,<br>1993    | gravel                                                                        | /                                           | /                                                                                                                                             | /                                                                                                                                                                                                                                                                                                                                                                                                        |
| Wagenhoff <i>et al.</i> ,<br>2014 | gravels and sand                                                              | /                                           | wood logs in both<br>streams                                                                                                                  | /                                                                                                                                                                                                                                                                                                                                                                                                        |
| Wagner <i>et al.</i> ,<br>2003    | gravel to fine                                                                | /                                           | steep slope in the<br>upstream section.<br>Downstream<br>section<br>characterized by<br>wetland area<br>between the hill<br>and the left bank | Riparian vegetation: <i>Salix<br/>caprea</i> L., <i>Salix myrsinifolia</i><br><i>Picea abies</i> L., <i>Fraxinus<br/>excelsior</i> L., <i>Acer<br/>pseudoplatanus</i> L., <i>Fagus<br/>sylvatica</i> L. and <i>Corylus<br/>avellana</i> L. Also present but<br>less abundant are <i>Acer<br/>platanoides</i> L., <i>Alnus<br/>incana</i> <i>Cornus sanguinea</i><br>L. and <i>Crataegus<br/>monogyna</i> |
| Wondzell <i>et al.</i> ,<br>2009  | fine gravel to sand                                                           | /                                           | low gradient                                                                                                                                  | /                                                                                                                                                                                                                                                                                                                                                                                                        |
| Wondzell <i>et al.</i> ,<br>2006  | boulders, cobbles, gravels and finer textured<br>sediment                     | $9.2 \text{ m day}^{-1}$                    | steep channels                                                                                                                                | wood debris                                                                                                                                                                                                                                                                                                                                                                                              |
| Wroblicky <i>et al.</i> ,<br>1998 | poorly sorted, gravelly, coarse sand with<br>occasional cobbles and boulders. | see Table 2 for<br>hydraulic conductivities | /                                                                                                                                             | /                                                                                                                                                                                                                                                                                                                                                                                                        |
| Zarnetske <i>et al.</i> ,<br>2011 | sand, gravel, cobbles, and boulders.                                          | /                                           | planebed and<br>riffles $0.007 \text{ m m}^{-1}$<br>(reach slope)                                                                             | /                                                                                                                                                                                                                                                                                                                                                                                                        |
